# Supplementary material for: Degradation of methylene blue by an E-Fenton process coupled with peroxymonosulfate via free radical and non-radical oxidation pathways
Source: Royal Society of Chemistry journal article supplement (doi:10.1039/d2nj05504j), 2023-01-01
Supplement: d2nj05504j1.pdf [file d2nj05504j1.pdf]

**Degradation of methylene blue by E-Fenton process coupled with  
peroxymonosulfate via free radical and non-radical oxidation  
pathways**

Song Wang<sup>a,b</sup> and Yonggang Zhang <sup>\*a,b</sup>

a. State Key Laboratory of Separation Membranes and Membrane Processes, Tiangong University, Tianjin 300387, China.

b. School of Environmental Science and Engineering, Tiangong University, Tianjin 300387, China

\*Corresponding author.

E-mail addresses: zhangyonggang1895@163.com (Yonggang Zhang)

*New Journal of chemistry*

3 #540-3910 RT: 1.43-9.92 AV: 180 SB: 12 4.87-5.15, 4.87-5.15 NL: 2.74E7  
T: FTMS + c ESI Full ms [50.0000-750.0000]

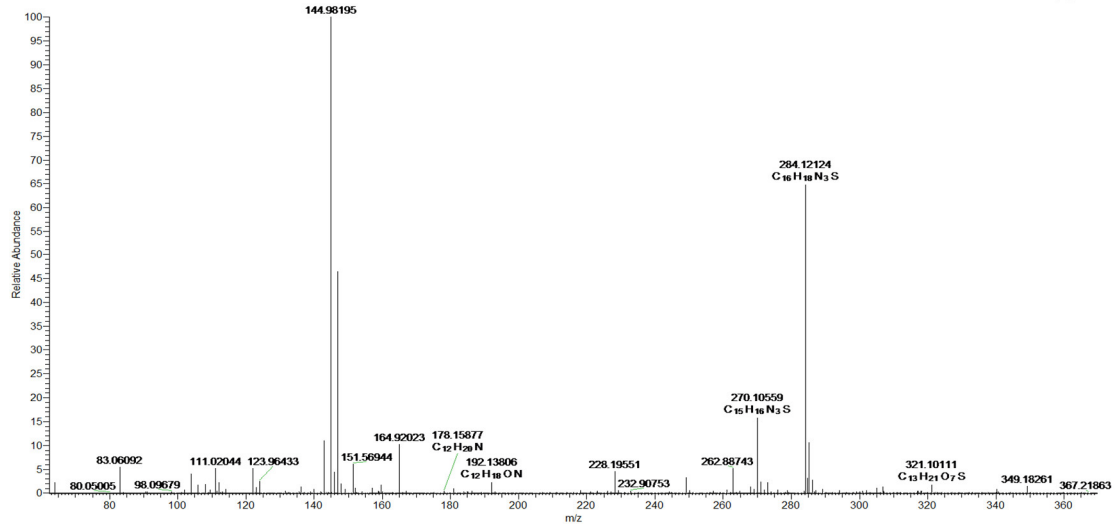

(a)

4 #540-3910 RT: 1.45-10.06 AV: 184 SB: 12 4.95-5.24, 4.95-5.23 NL: 1.01E7  
T: FTMS + c ESI Full ms [50.0000-750.0000]

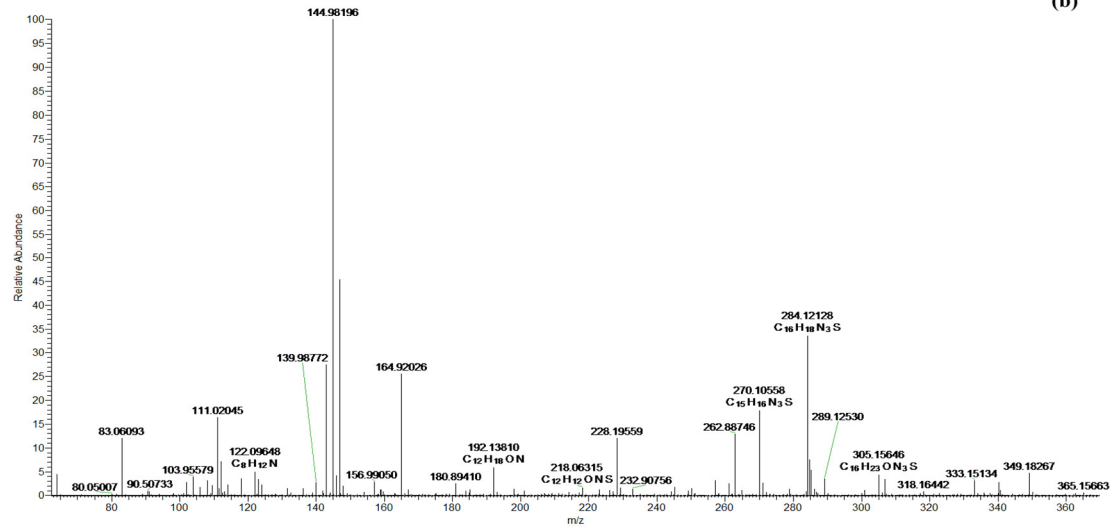

(b)

Fig.S1 MS spectra of MB after the degradation by EF-PMS process at different time: (a)20min, (b) 40 min.

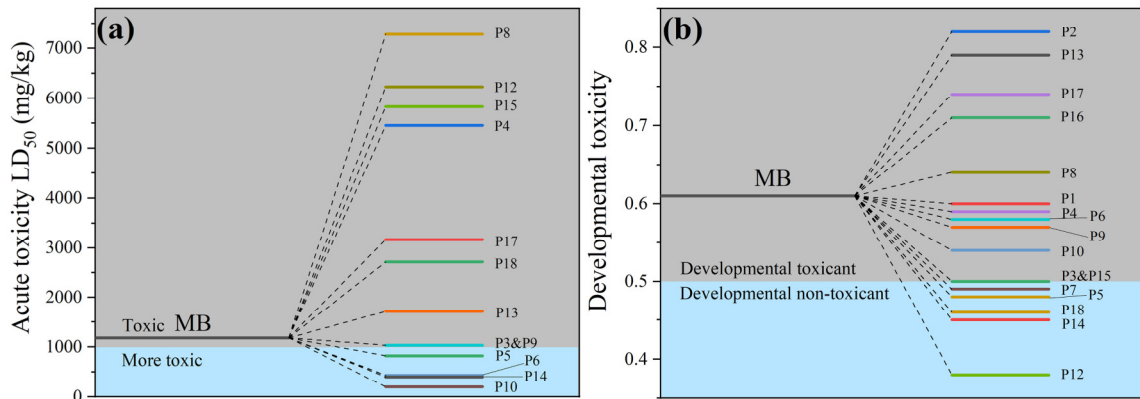

Fig.S2 (a) Acute toxicity, (b) developmental toxicity of MB and degradation intermediates in EF-PMS process

Table S1 Byproducts from the degradation of MB

| Number | Molecular Formula   | m/z | Possible structural formula                                                          |
|--------|---------------------|-----|--------------------------------------------------------------------------------------|
| P1     | $C_{16}H_{18}N_3S$  | 284 | 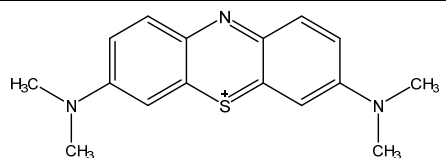   |
| P2     | $C_{16}H_{23}ON_3S$ | 305 |    |
| P3     | $C_8H_8N_2O_2$      | 164 |    |
| P4     | $C_6H_7O_3NS$       | 173 |    |
| P5     | $C_6H_7ON$          | 109 |   |
| P6     | $C_6H_6O$           | 94  |  |
| P7     | $C_{12}H_{10}N_3S$  | 228 |  |
| P8     | $C_6H_8O_3N_2S$     | 188 |  |
| P9     | $C_6H_7O_2N$        | 125 |  |
| P10    | $C_6H_6O_2$         | 110 |  |
| P11    | $C_6H_4O_2$         | 108 |  |
| P12    | $C_6H_6O_4$         | 142 |  |

|     |                  |     |                                                                                     |
|-----|------------------|-----|-------------------------------------------------------------------------------------|
| P13 | $C_4H_4O_4$      | 116 | 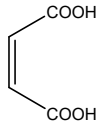 |
| P14 | $C_7H_5NS$       | 135 |   |
| P15 | $C_6H_7O_3NS$    | 173 |   |
| P16 | $C_{13}H_{17}ON$ | 203 |   |
| P17 | $C_{13}H_{18}O$  | 190 |   |
| P18 | $C_7H_{12}O_2$   | 128 |  |
| P19 | $C_5H_{10}O_2$   | 102 | $CH_3(CH_2)_3COOH$                                                                  |
| P20 | $C_2H_4O_2$      | 60  | $CH_3COOH$                                                                          |
